# Supplementary material for: A Potent Neutralizing Nanobody Targeting the Spike Receptor-Binding Domain of SARS-CoV-2 and the Structural Basis of Its Intimate Binding
Source: PubMed Central journal article supplement (PMC9158119; doi:10.3389/fimmu.2022.820336), 2022-05-18
Supplement: DataSheet_1.pdf [file DataSheet_1.pdf]

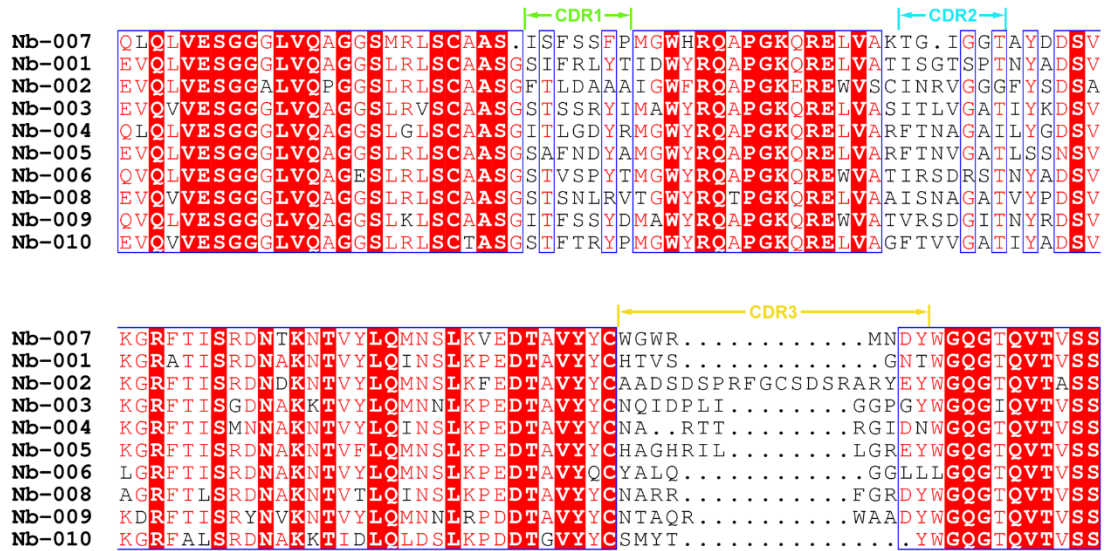

**Supplementary Figure 1.** Multiple sequence alignment of the ten nanobodies with unique sequences identified in this study. The CDR regions are marked.

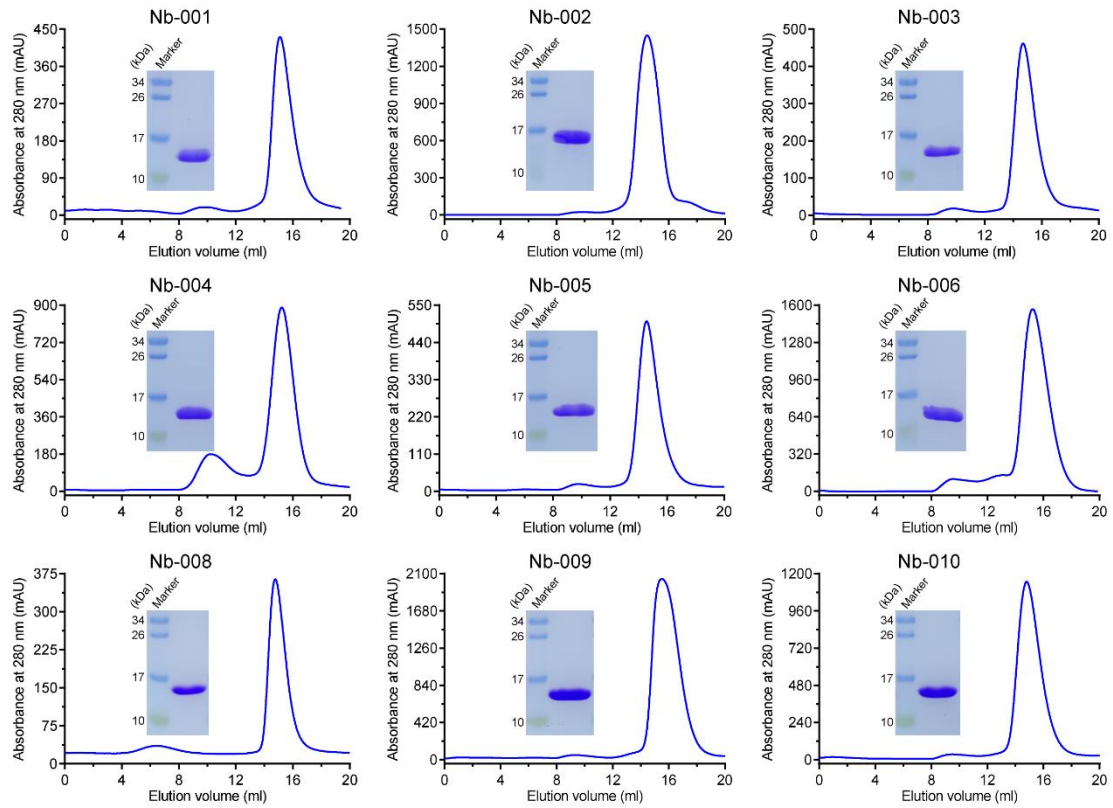

**Supplementary Figure 2.** Purification and gel-filtration characteristics of the indicated nanobodies. Solution behaviors of the 9 non-neutralizing nanobodies identified in the study on a Superdex™ 75 10/300 GL column are shown. The inset figure shows the SDS-PAGE analyses of the pooled samples.

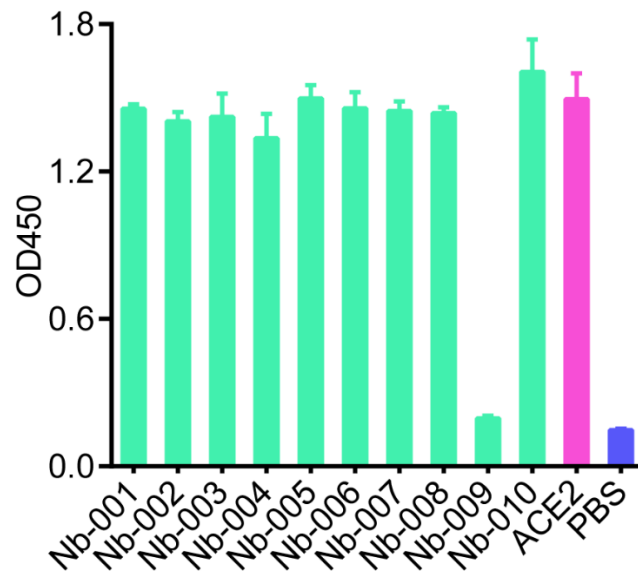

**Supplementary Figure 3.** Binding of the indicated nanobodies to SARS-CoV-2 S-RBD verified by single-concentration ELISA-binding assay. The experiments were performed with 200 ng SARS-CoV-2 S-RBD immobilized on the plate and 0.2  $\mu$ g nanobodies (green) or ACE2 (magenta) as the analyte. The emission OD450 was plotted as histograms. The error bar shows the mean  $\pm$  SD from three independent experiments.

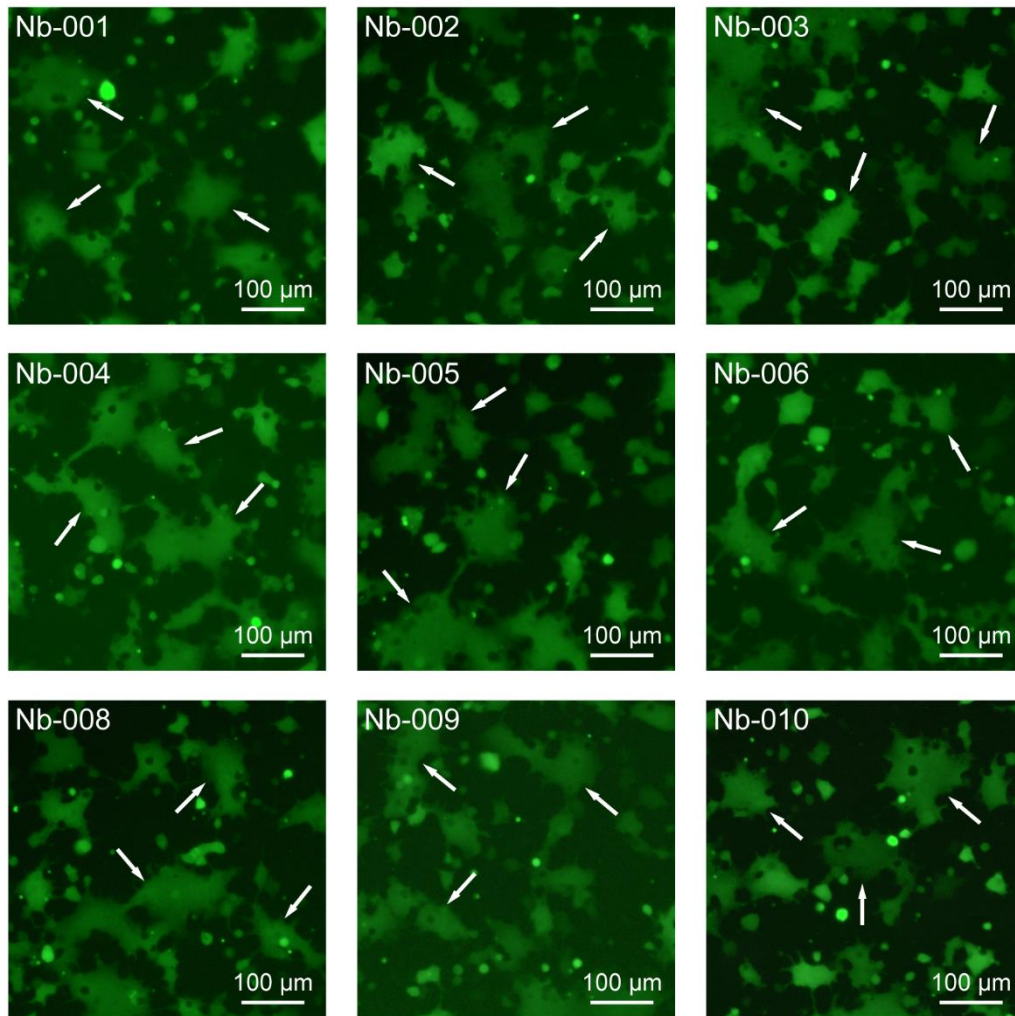

**Supplementary Figure 4.** Initial screenings for the potential virus-entry inhibition by the indicated nanobodies based on the S-mediated syncytium-formation assay. SARS-CoV-2 S-mediated cell–cell fusion experiments were performed in the presence of 10 μM nanobody. The formed syncytia are marked with white arrows. Scale bar equals 100 μm.

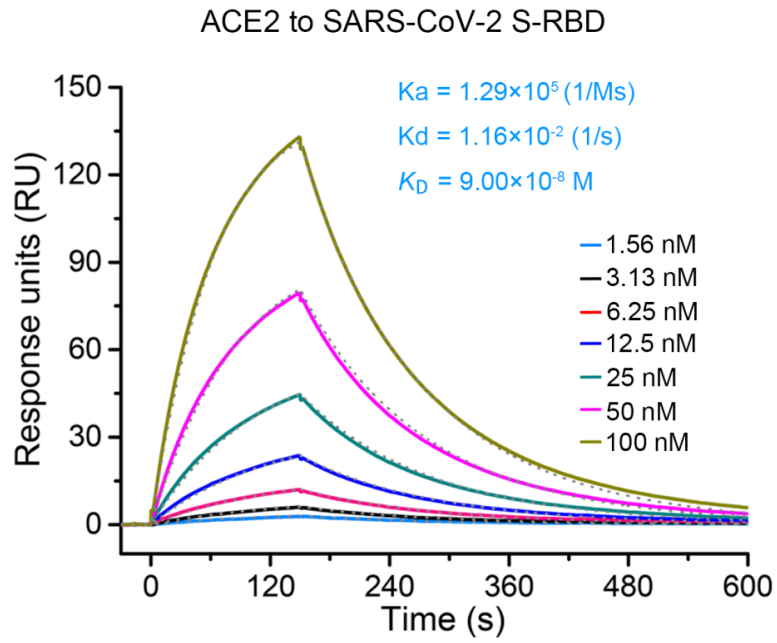

**Supplementary Figure 5.** Binding capacity of ACE2 to SARS-CoV-2 S-RBD detected via SPR. The recorded binding profiles and calculated kinetic parameters are shown.

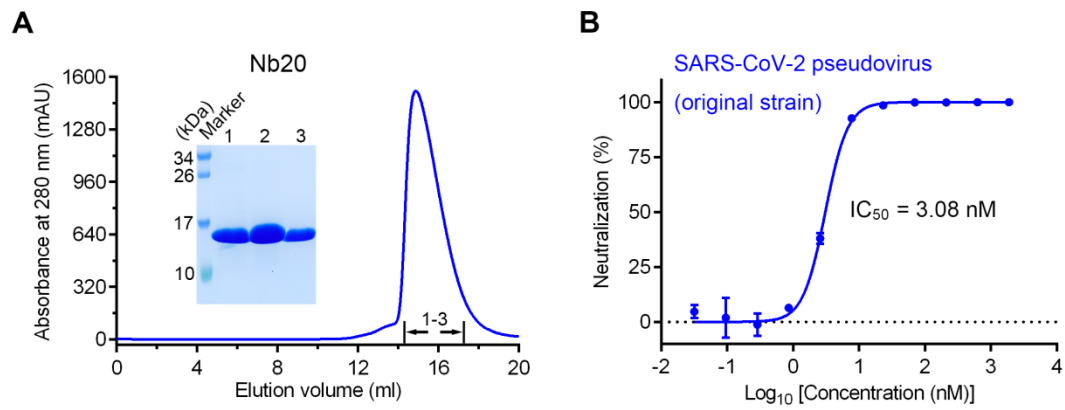

**Supplementary Figure 6.** Solution behavior and pseudovirus neutralization of Nb20.

**(A)** Purification and gel-filtration characterization of Nb20. The inset figure shows the SDS-PAGE analyses of the pooled samples. **(B)** Neutralization of SARS-CoV-2 pseudovirus (original strain) by Nb20. The error bar stands for the mean  $\pm$  SD from triplicate experiences.

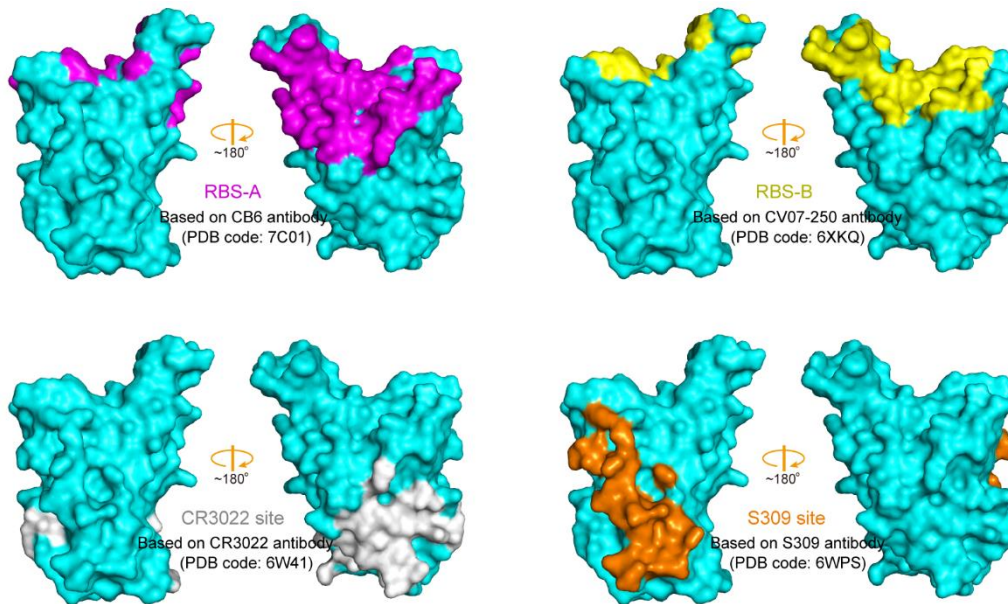

**Supplementary Figure 7.** The currently-defined antigenic sites on S-RBD of SARS-CoV-2. For easy comparison, the S-RBD molecules are oriented similarly and rendered as molecular surface in cyan. The antigenic sites are depicted as follows: RBS-A epitope in magenta, RBS-B epitope in yellow, CR3022 site in gray, and S309 site in orange. The epitope of RBS-C is shown in main-text figure 4.

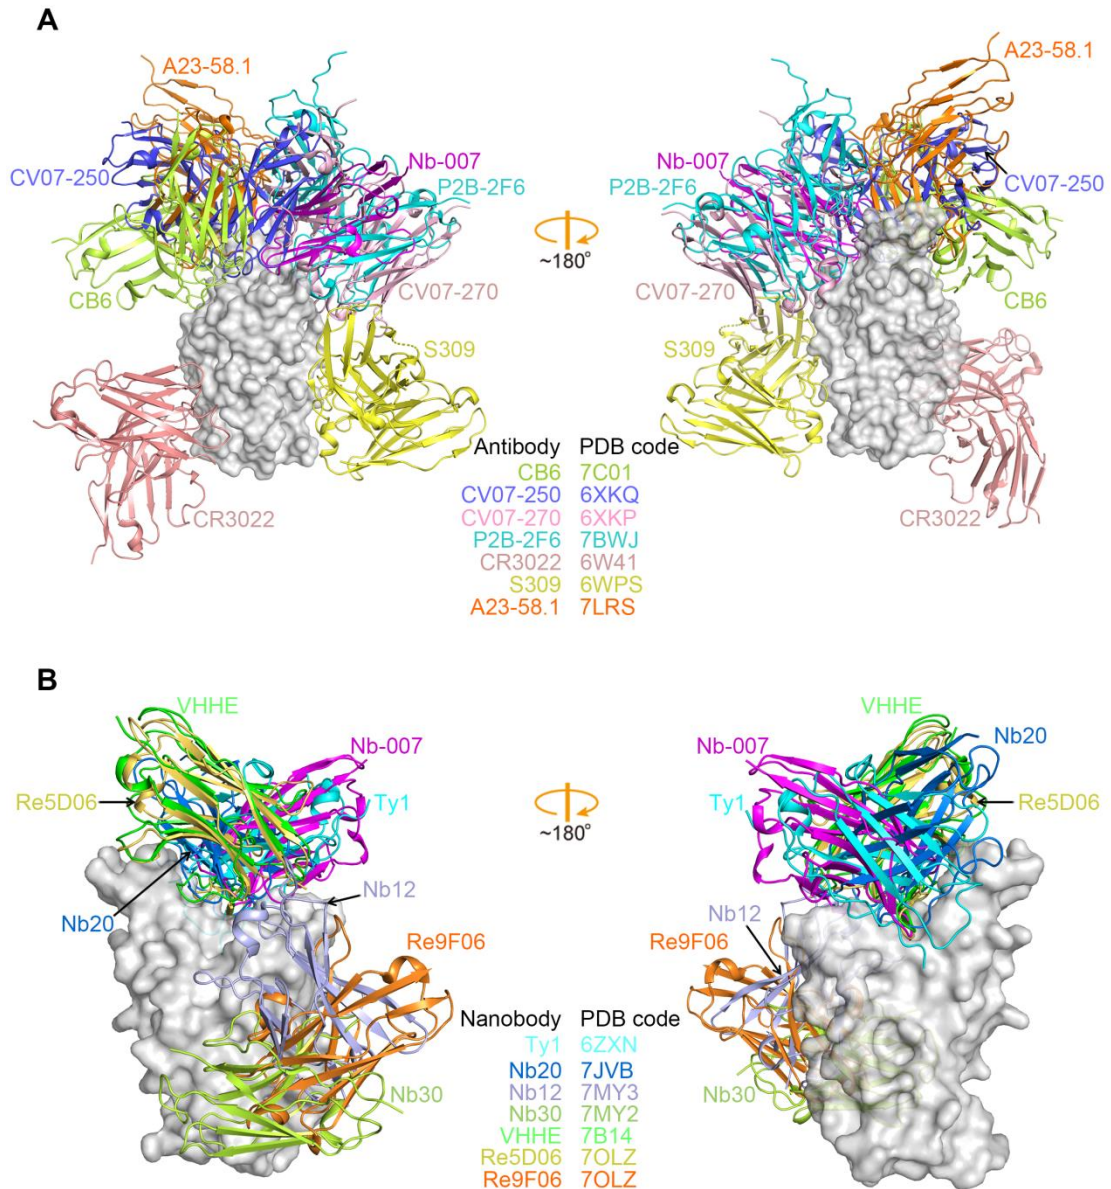

**Supplementary Figure 8.** Comparison of the epitope of Nb-007 with those of the indicated antibodies and nanobodies. **(A)** Superimposition of the structures of S-RBD (gray) in complex with Nb-007 (magenta) and antibodies CB6 (lemon, PDB code: 7C01), CV07-250 (blue, PDB code: 6XKQ), CV07-270 (light-pink, PDB code: 6XKP), P2B-2F6 (cyan, PDB code: 7BWJ), CR3022 (salmon, PDB code: 6W41), S309 (yellow, PDB code: 6WPS) and A23-58.1 (orange, PDB code: 7LRS). **(B)** Superimposition of the structures of S-RBD (gray) in complex with nanobodies Ty1 (cyan, PDB code: 6ZXN), Nb20 (blue, PDB code: 7JVB), Nb12 (light-blue, PDB



code: 7MY3), Nb30 (lemon, PDB code: 7MY2), VHHE (green, PDB code: 7B14), Re5D06 (yellow, PDB code: 7OLZ), Re9F06 (orange, PDB code: 7OLZ), and Nb-007 (magenta). Antibodies and nanobodies are shown in cartoon and RBD is shown in surface representation.

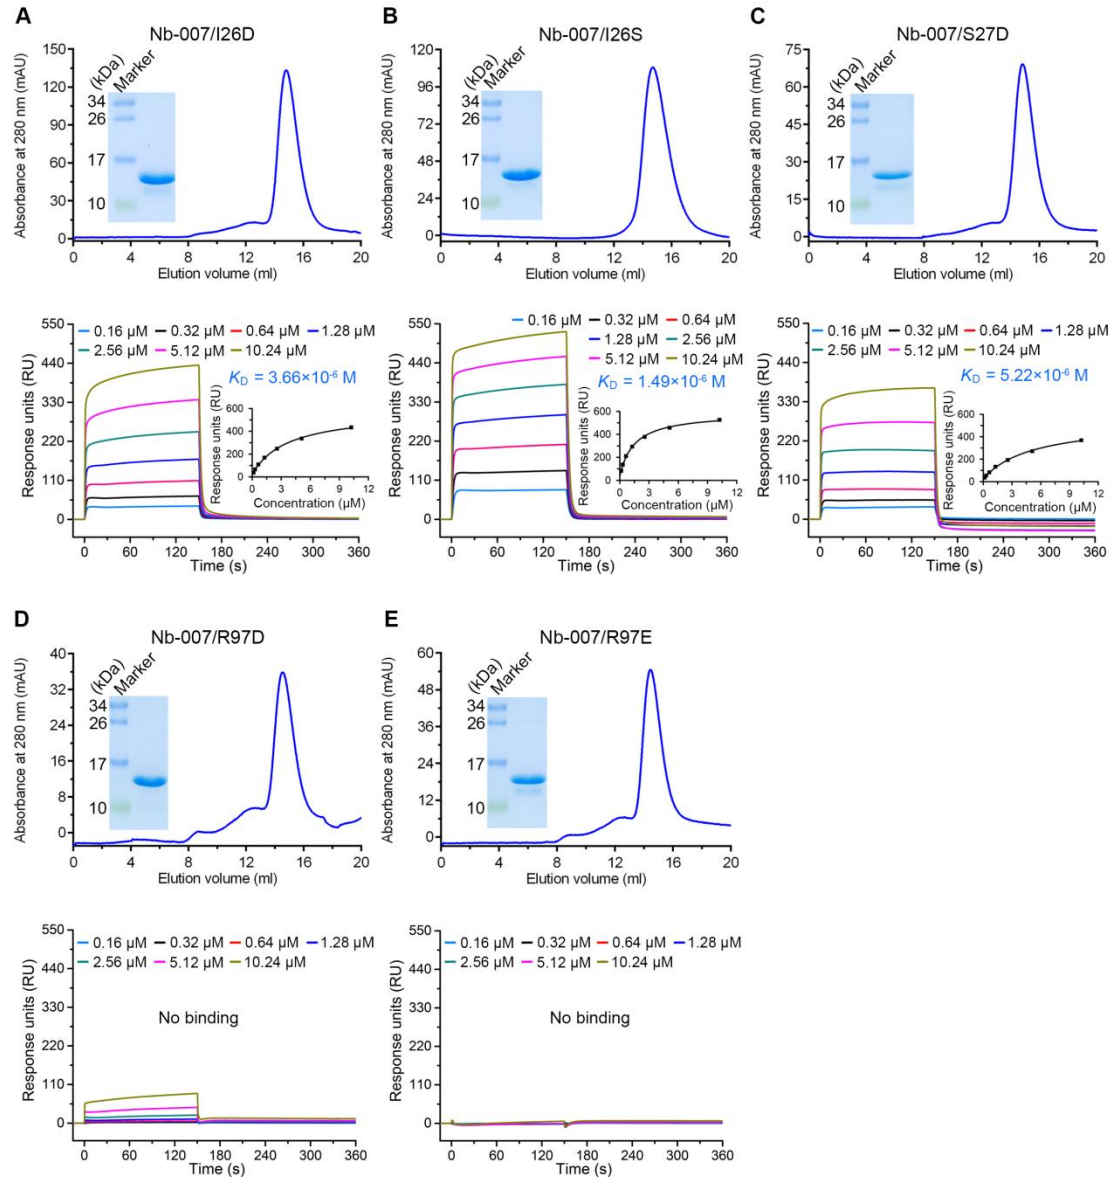

**Supplementary Figure 9.** Solution behaviors and binding capacity of Nb-007 mutants. (A-E) Characterization of the solution behavior of Nb-007/I26D (A), Nb-007/I26S (B), Nb-007/S27D (C), Nb-007/R97D (D), Nb-007/R97E (E) by gel filtration chromatography (upper panel) and the affinity calculation of the binding of individual mutants to SARS-CoV-2 Beta variant S-RBD using SPR (lower panel).

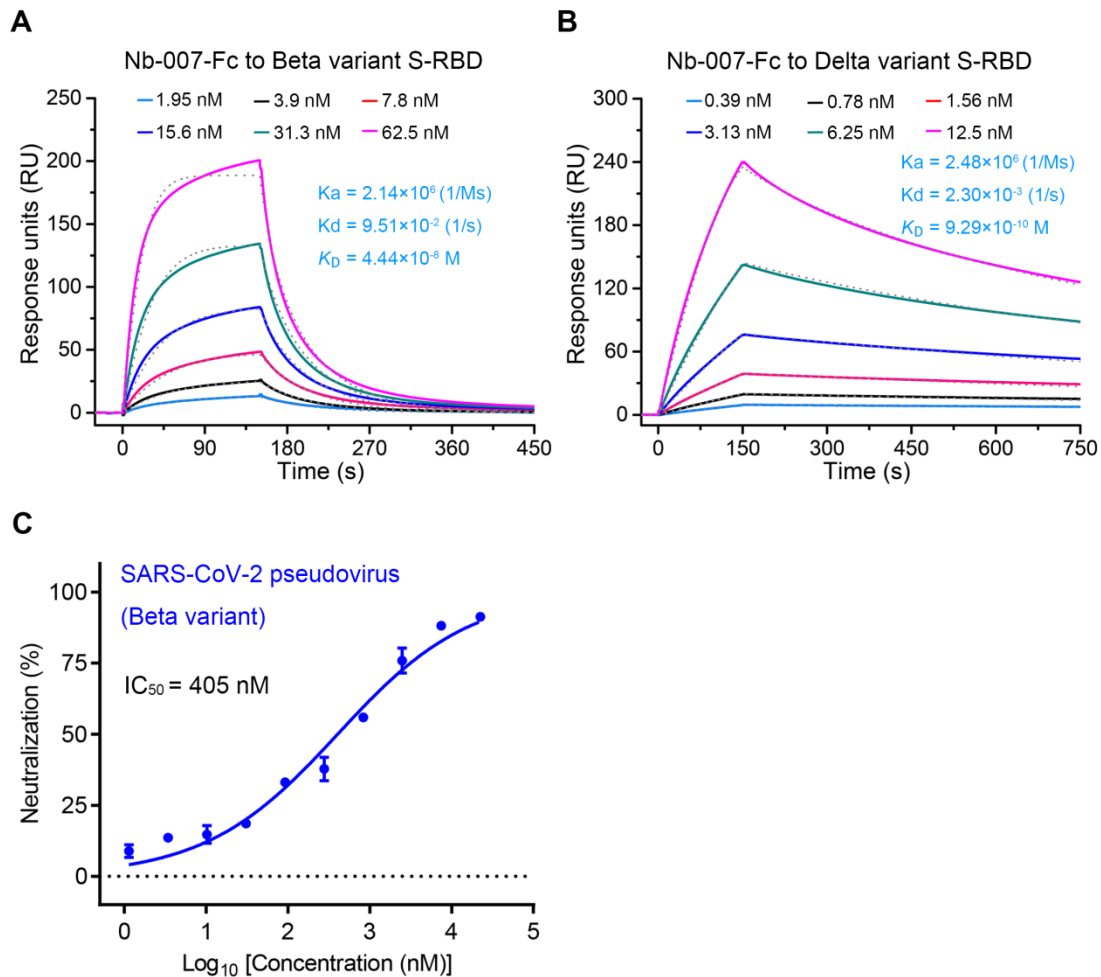

**Supplementary Figure 10.** Binding capacity and neutralizing activity of Nb-007-Fc against SARS-CoV-2 variants. **(A, B)** Affinity analysis of the binding of Nb-007-Fc to SARS-CoV-2 Beta variant S-RBD (A) and Delta variant S-RBD (B) using SPR. The real-time binding kinetics are shown. **(C)** Inhibition of the pseudovirus entry by Nb-007-Fc at the indicated concentrations for the SARS-CoV-2 Beta variant. Error bar represents the mean  $\pm$  SD of triplicate.

**Supplementary Table 1.** Data collection and structure refinement statistics.

---

| SARS-CoV-2 S-RBD with Nb-007<br>(PDB code: 7W1S)    |                                     |
|-----------------------------------------------------|-------------------------------------|
| <b>Data collection</b>                              |                                     |
| Space group                                         | <i>P4<sub>1</sub>2<sub>1</sub>2</i> |
| Cell dimensions                                     |                                     |
| <i>a, b, c</i> (Å)                                  | 56.80, 56.80, 219.77                |
| <i>α, β, γ</i> (°)                                  | 90.00, 90.00, 90.00                 |
| Wavelength (Å)                                      | 0.97915                             |
| Resolution (Å)                                      | 50.00-2.00 (2.07-2.00)              |
| Unique reflections                                  | 25547 (2451)                        |
| <i>R</i> <sub>merge</sub>                           | 0.182 (0.739)                       |
| CC <sub>1/2</sub>                                   | 0.999 (0.900)                       |
| <i>I</i> / <i>σI</i>                                | 16.50 (2.00)                        |
| Completeness (%)                                    | 99.9 (99.2)                         |
| Redundancy                                          | 17.4 (11.4)                         |
| <b>Refinement</b>                                   |                                     |
| Resolution (Å)                                      | 29.65-2.00                          |
| No. reflections                                     | 25292                               |
| <i>R</i> <sub>work</sub> / <i>R</i> <sub>free</sub> | 0.199/0.223                         |
| No. atoms                                           |                                     |
| Protein                                             | 2388                                |
| Ligand/ion                                          | 0                                   |
| Water                                               | 268                                 |
| <i>B</i> -factors                                   |                                     |
| Protein                                             | 28.5                                |
| Ligand/ion                                          | -                                   |
| Water                                               | 39.1                                |
| R.m.s. deviations                                   |                                     |
| Bond lengths (Å)                                    | 0.004                               |
| Bond angles (°)                                     | 0.567                               |
| Ramachandran plot (%)                               |                                     |
| Favored region                                      | 98.01                               |
| Allowed region                                      | 1.99                                |
| Outlier region                                      | 0                                   |

---

A single crystal was used to collect the data.

Values in parentheses are for the highest-resolution shell.
